# Supplementary material
Source: publisher figshare collection journal article supplement (https://tandf.figshare.com/articles/dataset/_/8152868)
Supplement: Supplementary file 1 [file 1]

Archive with 8 entries (8 files):
- ineg_a_1611805_sm9098.mp4
- ineg_a_1611805_sm9097.tif
- ineg_a_1611805_sm9096.tif
- ineg_a_1611805_sm9095.tif
- ineg_a_1611805_sm9094.tif
- ineg_a_1611805_sm9093.pdf
- ineg_a_1611805_sm9092.pdf
- ineg_a_1611805_sm9091.pdf
