# Supplementary material
Source: publisher figshare collection journal article supplement (https://tandf.figshare.com/articles/dataset/_/8152868)
Supplement: Supplementary file 1 [file 1 › ineg_a_1611805_sm9091.pdf]

Supplementary Table 1. Statistical result without false discovery rate control.

| Fig | Data                             | Stat. meth. | Pairwise        |                    | p value  |     |
|-----|----------------------------------|-------------|-----------------|--------------------|----------|-----|
| 1C  | CS/M/Int/Rec PS of <i>D. mel</i> | WSR         | Before          | After              | 3.62E-05 | *** |
|     | CS/M/Int/WN                      | WSR         | Before          | After              | 0.986    |     |
|     | CS/M/Int/PT (167 Hz)             | WSR         | Before          | After              | 0.485    |     |
|     | CS/M/Int/PS (15-ms IPI)          | WSR         | Before          | After              | 1.000    |     |
|     | CS/M/Int/PS (35-ms IPI)          | WSR         | Before          | After              | 0.005    | **  |
|     | CS/M/Int/PS (75-ms IPI)          | WSR         | Before          | After              | 0.837    |     |
|     | CS/M/Int/PS (105-ms IPI)         | WSR         | Before          | After              | 0.686    |     |
| 1D  | CS/M/Int                         | KW          | -               | -                  | 3.73E-05 | *** |
|     |                                  | SD          | Recorded PS     | White noise        | 0.003    | *   |
|     |                                  |             | Recorded PS     | PT (167 Hz)        | 0.011    | *   |
|     |                                  |             | Recorded PS     | PS (15-ms IPI)     | 0.343    |     |
|     |                                  |             | Recorded PS     | PS (35-ms IPI)     | 0.991    |     |
|     |                                  |             | Recorded PS     | PS (75-ms IPI)     | 0.017    | *   |
|     |                                  |             | Recorded PS     | PS (105-ms IPI)    | 0.132    |     |
|     |                                  |             | White noise     | PT (167 Hz)        | 0.995    |     |
|     |                                  |             | White noise     | PS (15-ms IPI)     | 0.194    |     |
|     |                                  |             | White noise     | PS (35-ms IPI)     | 0.010    | **  |
|     |                                  |             | White noise     | PS (75-ms IPI)     | 0.961    |     |
|     |                                  |             | White noise     | PS (105-ms IPI)    | 0.705    |     |
|     |                                  |             | PT (167 Hz)     | PS (15-ms IPI)     | 0.503    |     |
|     |                                  |             | PT (167 Hz)     | PS (35-ms IPI)     | 0.040    | *   |
|     |                                  |             | PT (167 Hz)     | PS (75-ms IPI)     | 1.000    |     |
|     |                                  |             | PT (167 Hz)     | PS (105-ms IPI)    | 0.926    |     |
|     |                                  |             | PS (15-ms IPI)  | PS (35-ms IPI)     | 0.685    |     |
|     |                                  |             | PS (15-ms IPI)  | PS (75-ms IPI)     | 0.630    |     |
|     |                                  |             | PS (15-ms IPI)  | PS (105-ms IPI)    | 0.999    |     |
|     |                                  |             | PS (35-ms IPI)  | PS (75-ms IPI)     | 0.053    |     |
|     |                                  |             | PS (35-ms IPI)  | PS (105-ms IPI)    | 0.380    |     |
|     |                                  |             | PS (75-ms IPI)  | PS (105-ms IPI)    | 0.965    |     |
| 2A  | CS/M/Wc/Rec PS of <i>D. mel</i>  | WSR         | Before          | After              | 0.001    | *** |
|     | CS/M/Wc/PS (15-ms IPI)           | WSR         | Before          | After              | 0.134    |     |
|     | CS/M/Wc/PS (35-ms IPI)           | WSR         | Before          | After              | 5.25E-07 | *** |
|     | CS/M/Wc/PS (105-ms IPI)          | WSR         | Before          | After              | 0.012    | *   |
|     | CS/M/Wc/PS (35-ms IPI)/FR        | WSR         | Before          | After              | 6.33E-08 | *** |
|     | CS/M/Wc, Ac /PS (35-ms IPI)      | WSR         | Before          | After              | 0.028    | *   |
|     |                                  | KW          | -               | -                  | 8.25E-10 | *** |
| 2B  | CS/M/Wc                          | SD          | Recorded PS     | PS (15-ms IPI)     | 4.72E-05 | *** |
|     |                                  |             | Recorded PS     | PS (35-ms IPI)     | 0.479    |     |
|     |                                  |             | Recorded PS     | PS (105-ms IPI)    | 0.005    | **  |
|     |                                  |             | Recorded PS     | PS (35-ms IPI) /FR | 0.278    |     |
|     |                                  |             | Recorded PS     | PS (35-ms IPI)/Ac  | 0.001    | *** |
|     |                                  |             | PS (15-ms IPI)  | PS (35-ms IPI)     | 1.62E-05 | *** |
|     |                                  |             | PS (15-ms IPI)  | PS (105-ms IPI)    | 0.550    |     |
|     |                                  |             | PS (15-ms IPI)  | PS (35-ms IPI)/FR  | 1.52E-05 | *** |
|     |                                  |             | PS (15-ms IPI)  | PS (35-ms IPI)/Ac  | 0.956    |     |
|     |                                  |             | PS (35-ms IPI)  | PS (105-ms IPI)    | 0.024    | *   |
|     |                                  |             | PS (35-ms IPI)  | PS (35-ms IPI)/FR  | 0.998    |     |
|     |                                  |             | PS (35-ms IPI)  | PS (35-ms IPI)/Ac  | 0.001    | **  |
|     |                                  |             | PS (105-ms IPI) | PS (35-ms IPI)/FR  | 0.041    | *   |

|                    |                                             |          |                   |                     |                     |          |     |
|--------------------|---------------------------------------------|----------|-------------------|---------------------|---------------------|----------|-----|
| 3E                 | CS/M/Wc                                     | FM       | PS (105-ms IPI)   | PS (35-ms IPI)/Ac   | 0.966               |          |     |
|                    |                                             |          | PS (35-ms IPI) FR | PS (35-ms IPI)/Ac   | 0.002               | **       |     |
|                    |                                             |          | -                 | -                   | 2.29E-10            | ***      |     |
|                    |                                             |          | WNMT              | 1st PT (167 Hz)     | 1st PS (105-ms IPI) | 0.281    |     |
|                    |                                             |          |                   | 1st PT (167 Hz)     | 1st PS (15-ms IPI)  | 0.690    |     |
|                    |                                             |          |                   | 1st PT (167 Hz)     | 1st PS (35-ms IPI)  | 1.17E-04 | *** |
|                    |                                             |          |                   | 1st PT (167 Hz)     | 2nd PT (167 Hz)     | 0.979    |     |
|                    |                                             |          |                   | 1st PT (167 Hz)     | 2nd PS (105-ms IPI) | 1.000    |     |
|                    |                                             |          |                   | 1st PT (167 Hz)     | 2nd PS (15-ms IPI)  | 0.423    |     |
|                    |                                             |          |                   | 1st PT (167 Hz)     | 2nd PS (35-ms IPI)  | 0.017    |     |
|                    |                                             |          |                   | 1st PS (105-ms IPI) | 1st PS (15-ms IPI)  | 0.001    | **  |
|                    |                                             |          |                   | 1st PS (105-ms IPI) | 1st PS (35-ms IPI)  | 0.325    |     |
|                    |                                             |          |                   | 1st PS (105-ms IPI) | 2nd PT (167 Hz)     | 0.023    | *   |
|                    |                                             |          |                   | 1st PS (105-ms IPI) | 2nd PS (105-ms IPI) | 0.152    |     |
|                    |                                             |          |                   | 1st PS (105-ms IPI) | 2nd PS (15-ms IPI)  | 2.92E-04 | *** |
|                    |                                             |          |                   | 1st PS (105-ms IPI) | 2nd PS (35-ms IPI)  | 0.968    |     |
|                    |                                             |          |                   | 1st PS (15-ms IPI)  | 1st PS (35-ms IPI)  | 6.69E-09 | *** |
|                    |                                             |          |                   | 1st PS (15-ms IPI)  | 2nd PT (167 Hz)     | 0.996    |     |
|                    |                                             |          |                   | 1st PS (15-ms IPI)  | 2nd PS (105-ms IPI) | 0.853    |     |
|                    |                                             |          |                   | 1st PS (15-ms IPI)  | 2nd PS (15-ms IPI)  | 1.000    |     |
|                    |                                             |          |                   | 1st PS (15-ms IPI)  | 2nd PS (35-ms IPI)  | 1.35E-05 | *** |
|                    |                                             |          |                   | 1st PS (35-ms IPI)  | 2nd PT (167 Hz)     | 1.56E-06 | *** |
|                    |                                             |          |                   | 1st PS (35-ms IPI)  | 2nd PS (105-ms IPI) | 4.17E-05 | *** |
|                    |                                             |          |                   | 1st PS (35-ms IPI)  | 2nd PS (15-ms IPI)  | 3.19E-10 | *** |
|                    |                                             |          |                   | 1st PS (35-ms IPI)  | 2nd PS (35-ms IPI)  | 0.932    |     |
|                    |                                             |          |                   | 2nd PT (167 Hz)     | 2nd PS (105-ms IPI) | 0.998    |     |
|                    |                                             |          |                   | 2nd PT (167 Hz)     | 2nd PS (15-ms IPI)  | 0.952    |     |
|                    |                                             |          |                   | 2nd PT (167 Hz)     | 2nd PS (35-ms IPI)  | 4.35E-04 | *** |
|                    |                                             |          |                   | 2nd PS (105-ms IPI) | 2nd PS (15-ms IPI)  | 0.619    |     |
|                    |                                             |          |                   | 2nd PS (105-ms IPI) | 2nd PS (35-ms IPI)  | 0.006    | **  |
| 2nd PS (15-ms IPI) | 2nd PS (35-ms IPI)                          | 1.14E-06 |                   | ***                 |                     |          |     |
| 5A                 | <i>D. sec</i> /Int/Rec PS of <i>D. sec</i>  | WSR      |                   | Before              | After               | 0.024    | *   |
|                    | <i>D. sec</i> /Int/PS (35-ms IPI)           | WSR      |                   | Before              | After               | 0.424    |     |
|                    | <i>D. sec</i> /Int/PS (85-ms IPI)           | WSR      | Before            | After               | 0.931               |          |     |
| 5B                 | <i>D. sec</i> /Int/PS (105-ms IPI)          | WSR      | Before            | After               | 0.363               |          |     |
|                    | <i>D. sim</i> /Int/ Rec PS of <i>D. sim</i> | WSR      | Before            | After               | 0.750               |          |     |
|                    | <i>D. sim</i> /Int/PS (35-ms IPI)           | WSR      | Before            | After               | 0.199               |          |     |
|                    | <i>D. sim</i> /Int/PS (55-ms IPI)           | WSR      | Before            | After               | 0.835               |          |     |
| S2D                | <i>D. sim</i> /Int/PS (105-ms IPI)          | WSR      | Before            | After               | 0.747               |          |     |
|                    | CS/F/Int/PS (35-ms IPI)                     | WSR      | Before            | After               | 0.065               |          |     |
|                    | OR/M/Int/PS (35-ms IPI)                     | WSR      | Before            | After               | 0.022               | *        |     |
|                    | OR/M/Wc/PS (35-ms IPI)                      | WSR      | Before            | After               | 0.147               |          |     |
| S3A                | CS/M/Int/PS (15-ms IPI)                     | WRS      | ±0±45             | ±90±45              | 0.272               |          |     |
| S3B                | CS/M/Int/PS (35-ms IPI)                     | WRS      | ±0±45             | ±90±45              | 0.241               |          |     |
| S3C                | CS/M/Int/PS (105-ms IPI)                    | WRS      | ±0±45             | ±90±45              | 0.427               |          |     |

Asterisks indicate statistical significance (\*p<0.05, \*\*p<0.01, \*\*\*p<0.001). Stat. meth. = statistical methods; CS = *Canton-S*; OR = *Oregon-R*; *D. mel* = *D. mel*; *D. sim* = *D. simulans*; *D. sec* = *D. sechellia*; M = male; F = female; Int = intact; Wc = wing-clipped; Ac = arista-clipped; FR = Far-red light; PS = pulse song; PT = pure tone; WN = white noise; Rec = recorded; WSR = Wilcoxon signed-rank test; WRS = Wilcoxon rank sum test; KW = Kruskal-Wallis test; SD = Steel-Dwass test; FM = Friedman test; WNMT = Wilcoxon-Nemenyi-McDonalds-Thompson test.
