# Supplementary material
Source: publisher figshare collection journal article supplement (https://tandf.figshare.com/articles/dataset/_/8152868)
Supplement: Supplementary file 1 [file 1 › ineg_a_1611805_sm9092.pdf]

Supplementary Table 2. Statistical values and result of Benjamini &amp; Hochberg's false discovery rate control.

| Fig | Flies | Sound                 | Stat. meth. | Trial | Rank of p | FDR $\alpha$ -level | Observed p |
|-----|-------|-----------------------|-------------|-------|-----------|---------------------|------------|
| 3A  | CS/Wc | PS (35-ms IPI, 1.0 s) | WSR         | 1     | 1/15      | 0.003               | 1.53E-05 * |
|     |       |                       |             | 2     | 2/15      | 0.007               | 0.001 *    |
|     |       |                       |             | 3     | 5/15      | 0.017               | 0.025      |
|     |       |                       |             | 4     | 3/15      | 0.010               | 0.009 *    |
|     |       |                       |             | 5     | 11/15     | 0.037               | 0.182      |
|     |       |                       |             | 6     | 9/15      | 0.030               | 0.091      |
|     |       |                       |             | 7     | 12/15     | 0.040               | 0.203      |
|     |       |                       |             | 8     | 6/15      | 0.020               | 0.027      |
|     |       |                       |             | 9     | 7/15      | 0.023               | 0.051      |
|     |       |                       |             | 10    | 10/15     | 0.033               | 0.172      |
|     |       |                       |             | 11    | 4/15      | 0.013               | 0.016      |
|     |       |                       |             | 12    | 14/15     | 0.047               | 0.547      |
|     |       |                       |             | 13    | 15/15     | 0.050               | 0.844      |
|     |       |                       |             | 14    | 8/15      | 0.027               | 0.063      |
|     |       |                       |             | 15    | 13/15     | 0.043               | 0.344      |
| 3B  | CS/Wc | PS (35-ms IPI, 0.5 s) | WSR         | 1     | 1/15      | 0.003               | 1.19E-07 * |
|     |       |                       |             | 2     | 2/15      | 0.007               | 0.000 *    |
|     |       |                       |             | 3     | 3/15      | 0.010               | 0.001 *    |
|     |       |                       |             | 4     | 4/15      | 0.013               | 0.001 *    |
|     |       |                       |             | 5     | 6/15      | 0.020               | 0.009 *    |
|     |       |                       |             | 6     | 10.5/15   | 0.035               | 0.074      |
|     |       |                       |             | 7     | 8/15      | 0.027               | 0.029      |
|     |       |                       |             | 8     | 7/15      | 0.023               | 0.013 *    |
|     |       |                       |             | 9     | 10.5/15   | 0.035               | 0.074      |
|     |       |                       |             | 10    | 9/15      | 0.030               | 0.050      |
|     |       |                       |             | 11    | 12/15     | 0.040               | 0.088      |
|     |       |                       |             | 12    | 14/15     | 0.047               | 0.875      |
|     |       |                       |             | 13    | 5/15      | 0.017               | 0.004 *    |
|     |       |                       |             | 14    | 15/15     | 0.050               | 0.934      |
|     |       |                       |             | 15    | 13/15     | 0.043               | 0.625      |
| 3C  | CS/Wc | PS (35-ms IPI, 0.2 s) | WSR         | 1     | 6/15      | 0.020               | 0.500      |
|     |       |                       |             | 2     | 3/15      | 0.010               | 0.375      |
|     |       |                       |             | 3     | 10/15     | 0.033               | 0.688      |
|     |       |                       |             | 4     | 6/15      | 0.020               | 0.500      |
|     |       |                       |             | 5     | 6/15      | 0.020               | 0.500      |
|     |       |                       |             | 6     | 1/15      | 0.003               | 0.125      |
|     |       |                       |             | 7     | 6/15      | 0.020               | 0.500      |
|     |       |                       |             | 8     | 9/15      | 0.030               | 0.625      |
|     |       |                       |             | 9     | 14.5/15   | 0.048               | 1.000      |
|     |       |                       |             | 10    | 12/15     | 0.040               | 0.813      |
|     |       |                       |             | 11    | 2/15      | 0.007               | 0.250      |
|     |       |                       |             | 12    | 6/15      | 0.020               | 0.500      |
|     |       |                       |             | 13    | 13/15     | 0.043               | 0.875      |
|     |       |                       |             | 14    | 14.5/15   | 0.048               | 1.000      |
|     |       |                       |             | 15    | 11/15     | 0.037               | 0.750      |
| 3D  | CS/Wc | PT                    | WSR         | 1     | 4/8       | 0.025               | 0.062      |
|     |       | PS (105-ms IPI)       |             | 2     | 3/8       | 0.019               | 4.58E-05 * |
|     |       | PS (15-ms IPI)        |             | 3     | 6/8       | 0.038               | 0.384      |
|     |       | PS (35-ms IPI)        |             | 4     | 2/8       | 0.013               | 6.57E-07 * |
|     |       | PT                    |             | 5     | 7/8       | 0.044               | 0.475      |
|     |       | PS (105-ms IPI)       |             | 6     | 5/8       | 0.031               | 0.216      |
|     |       | PS (15-ms IPI)        |             | 7     | 8/8       | 0.050               | 1.000      |
|     |       | PS (35-ms IPI)        |             | 8     | 1/8       | 0.006               | 9.31E-10 * |

|    |       |     |                      |    |       |       |       |   |
|----|-------|-----|----------------------|----|-------|-------|-------|---|
| 4B | CS/Wc | WSR | PS (35 ± 100-ms IPI) | 1  | 2/15  | 0.007 | 0.004 | * |
|    |       |     | PS (35 ± 50-ms IPI)  | 2  | 4/15  | 0.013 | 0.023 |   |
|    |       |     | PS (35 ± 20-ms IPI)  | 3  | 6/15  | 0.020 | 0.195 |   |
|    |       |     | PS (35 ± 10-ms IPI)  | 4  | 1/15  | 0.003 | 0.001 | * |
|    |       |     | PS (35 ± 1-ms IPI)   | 5  | 5/15  | 0.017 | 0.051 |   |
|    |       |     | PS (35 ± 100-ms IPI) | 6  | 14/15 | 0.047 | 1.000 |   |
|    |       |     | PS (35 ± 50-ms IPI)  | 7  | 11/15 | 0.037 | 0.750 |   |
|    |       |     | PS (35 ± 20-ms IPI)  | 8  | 9/15  | 0.030 | 0.625 |   |
|    |       |     | PS (35 ± 10-ms IPI)  | 9  | 3/15  | 0.010 | 0.008 | * |
|    |       |     | PS (35 ± 1-ms IPI)   | 10 | 10/15 | 0.033 | 0.656 |   |
|    |       |     | PS (35 ± 100-ms IPI) | 11 | 8/15  | 0.027 | 0.500 |   |
|    |       |     | PS (35 ± 50-ms IPI)  | 12 | 14/15 | 0.047 | 1.000 |   |
|    |       |     | PS (35 ± 20-ms IPI)  | 13 | 12/15 | 0.040 | 0.875 |   |
|    |       |     | PS (35 ± 10-ms IPI)  | 14 | 14/15 | 0.047 | 1.000 |   |
|    |       |     | PS (35 ± 1-ms IPI)   | 15 | 7/15  | 0.023 | 0.469 |   |

Asterisks indicate statistical significance (\*p<0.05). Stat. meth. = statistical methods; FDR = false discovery rate; CS = *Canton-S*; Wc = wing-clipped; PS = pulse song; PT = pure tone; WSR = Wilcoxon signed-rank test.
