# Supplementary material
Source: publisher figshare collection journal article supplement (https://tandf.figshare.com/articles/dataset/_/8152868)
Supplement: Supplementary file 1 [file 1 › ineg_a_1611805_sm9093.pdf]

Supplementary Table 3. Result of Shapiro-Wilk test.

| Flies               | Sound                   | N  | p value  |
|---------------------|-------------------------|----|----------|
| <i>CS</i> , Int     | Rec PS of <i>D. mel</i> | 41 | 1.20E-05 |
| <i>CS</i> , Int     | WN                      | 60 | 4.08E-13 |
| <i>CS</i> , Int     | PT (167 Hz)             | 40 | 6.10E-10 |
| <i>CS</i> , Int     | PS (15-ms IPI)          | 44 | 2.79E-07 |
| <i>CS</i> , Int     | PS (35-ms IPI)          | 44 | 1.87E-06 |
| <i>CS</i> , Int     | PS (75-ms IPI)          | 46 | 1.19E-10 |
| <i>CS</i> , Int     | PS (105-ms IPI)         | 40 | 1.39E-07 |
| <i>CS</i> , Wc      | Rec PS of <i>D. mel</i> | 16 | 0.117    |
| <i>CS</i> , Wc      | PS (15-ms IPI)          | 40 | 1.44E-08 |
| <i>CS</i> , Wc      | PS (35-ms IPI)          | 48 | 5.16E-05 |
| <i>CS</i> , Wc      | PS (105-ms IPI)         | 48 | 2.83E-10 |
| <i>CS</i> , Wc, FR  | PS (35-ms IPI)          | 40 | 6.07E-06 |
| <i>CS</i> , Wc, Ac  | PS (35-ms IPI)          | 43 | 1.59E-11 |
| <i>D. sec</i> , Int | Rec PS of <i>D. sec</i> | 42 | 2.19E-04 |
| <i>D. sec</i> , Int | PS (35-ms IPI)          | 34 | 1.49E-07 |
| <i>D. sec</i> , Int | PS (85-ms IPI)          | 37 | 4.54E-06 |
| <i>D. sec</i> , Int | PS (105-ms IPI)         | 37 | 2.01E-06 |
| <i>D. sim</i> , Int | Rec PS of <i>D. sim</i> | 36 | 2.13E-11 |
| <i>D. sim</i> , Int | PS (35-ms IPI)          | 40 | 7.37E-13 |
| <i>D. sim</i> , Int | PS (55-ms IPI)          | 37 | 4.54E-06 |
| <i>D. sim</i> , Int | PS (105-ms IPI)         | 36 | 3.95E-09 |

*CS* = Canton-S; *D. mel* = *D. mel*; *D. sim* = *D. simulans*; *D. sec* = *D. sechellia*; Int = intact; Wc = wing-clipped; Ac = arista-clipped; FR = Far-red light; PS = pulse song; PT = pure tone; WN = white noise; Rec = recorded.
