# Supplementary material
Source: publisher figshare collection journal article supplement (https://tandf.figshare.com/articles/dataset/_/8152868)

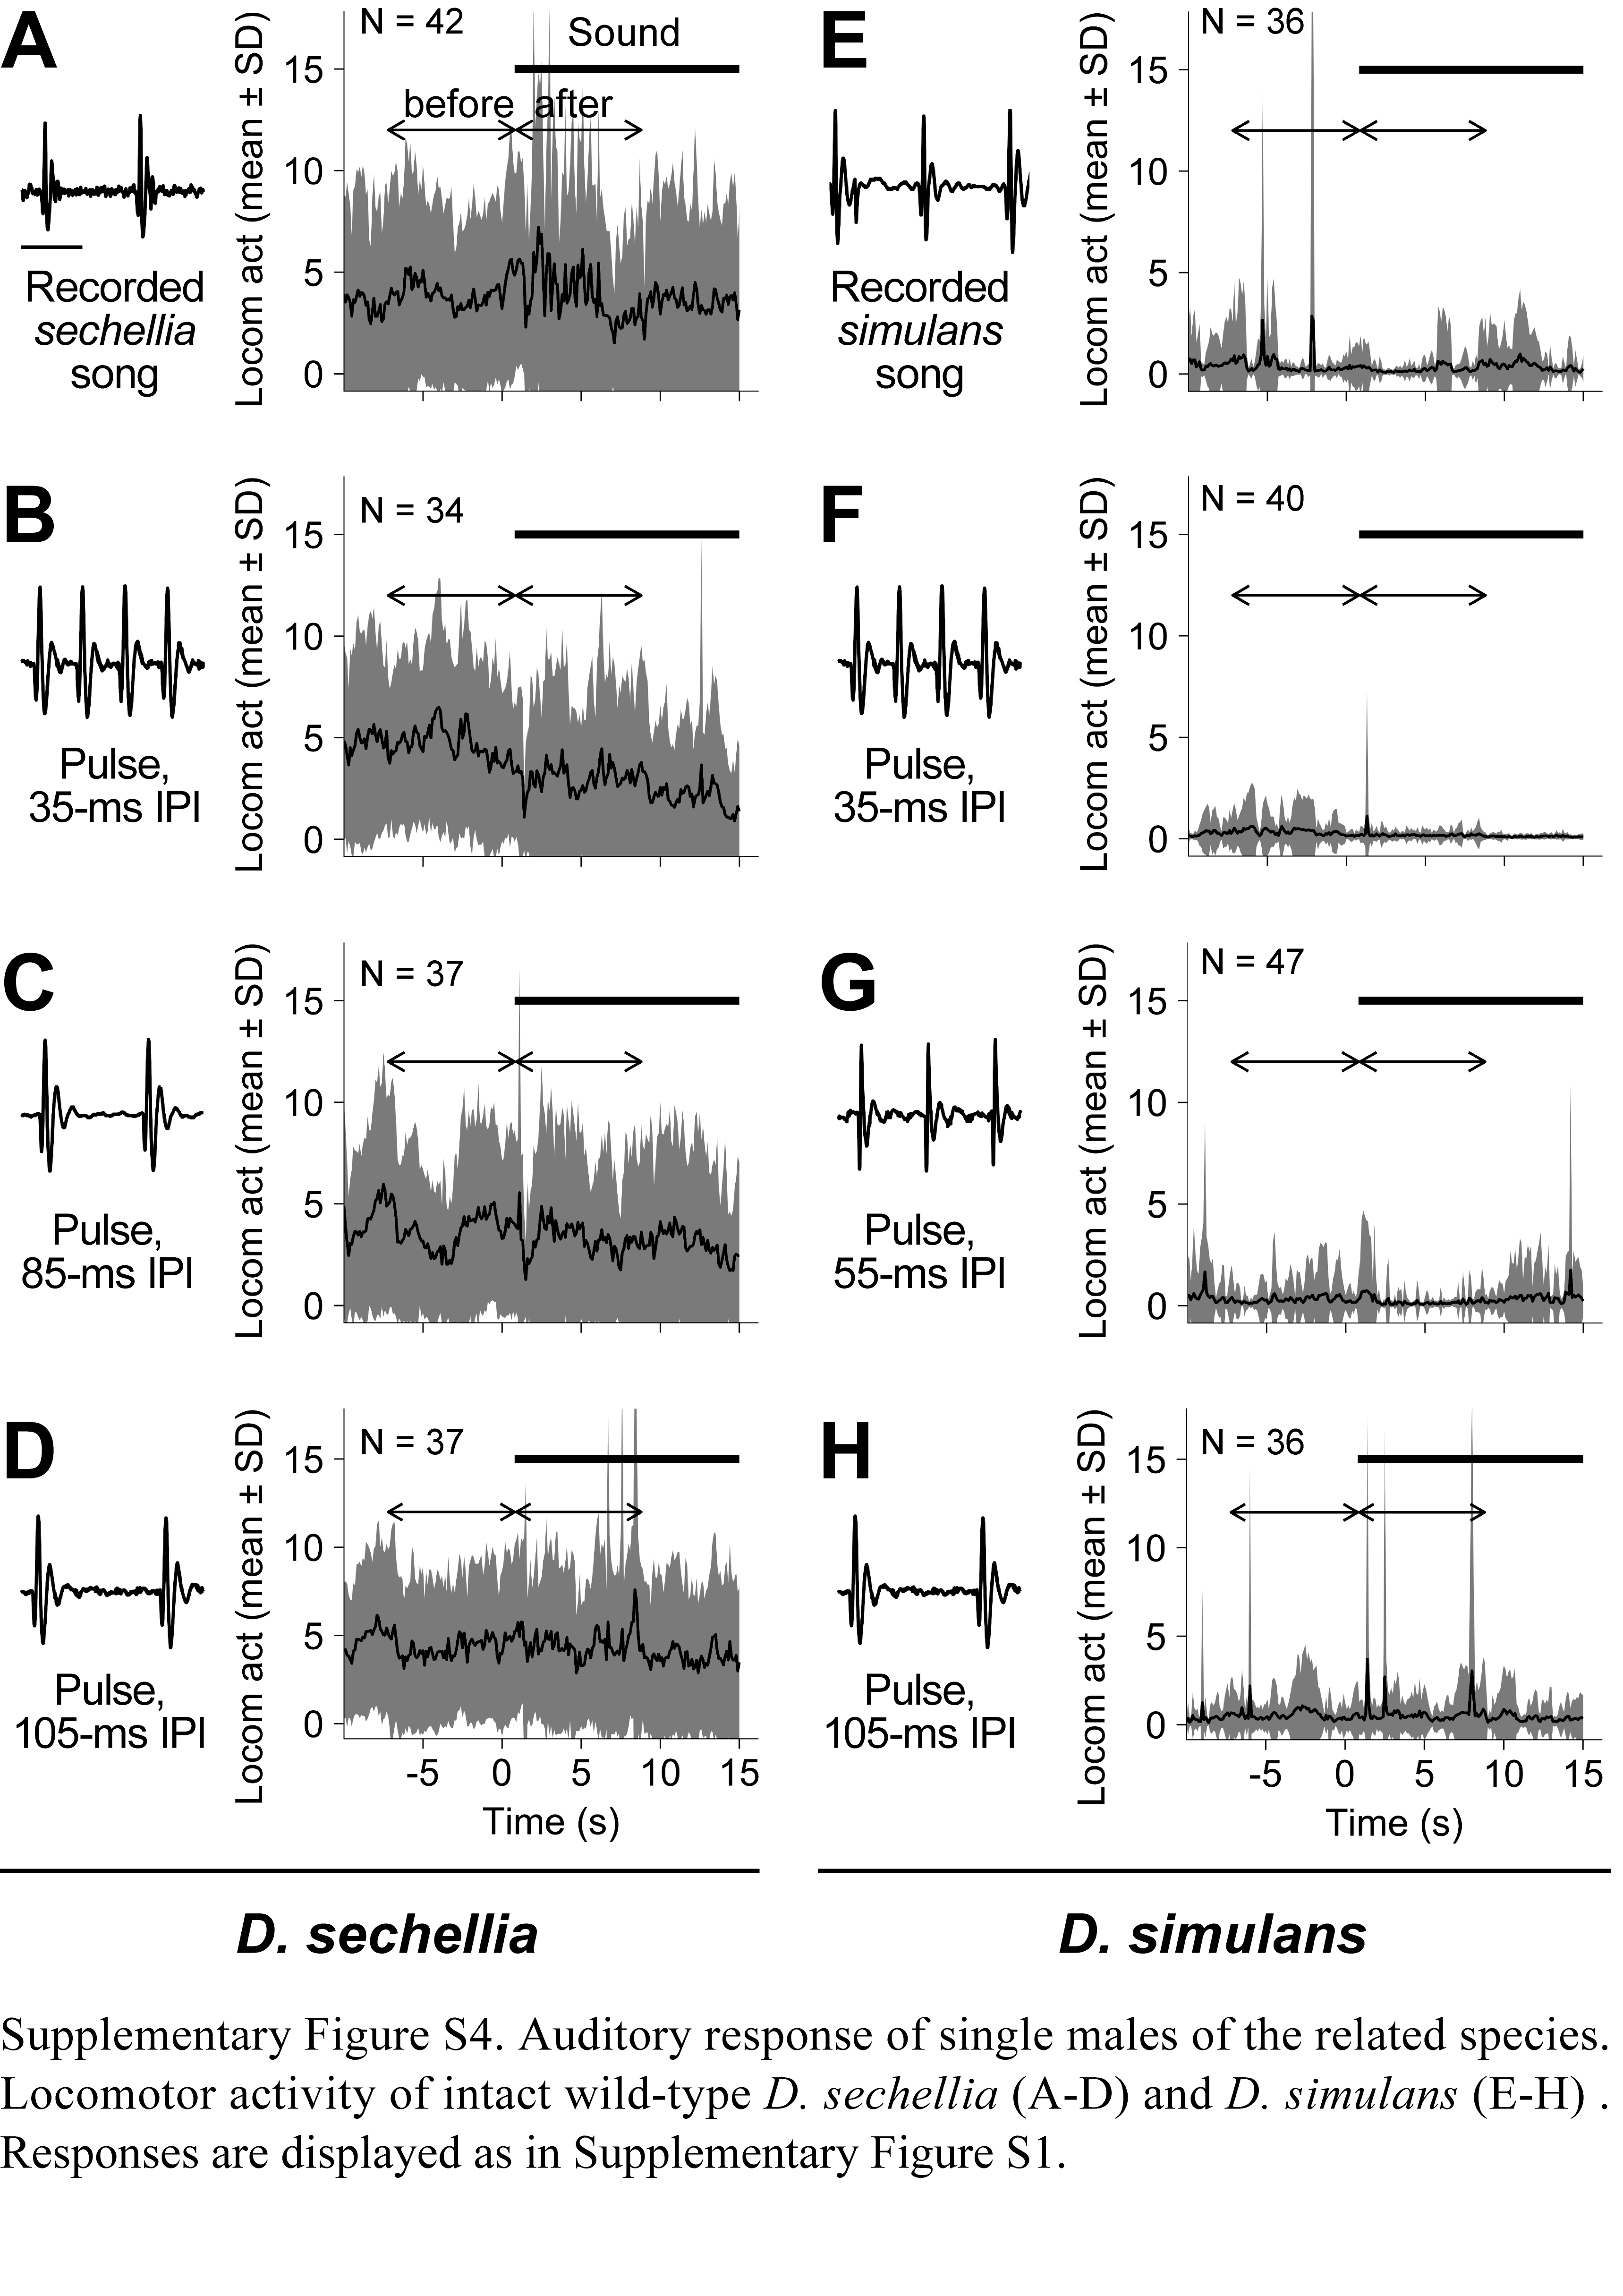

Supplement: Supplementary file 1 [file 1 › ineg_a_1611805_sm9097.tif]

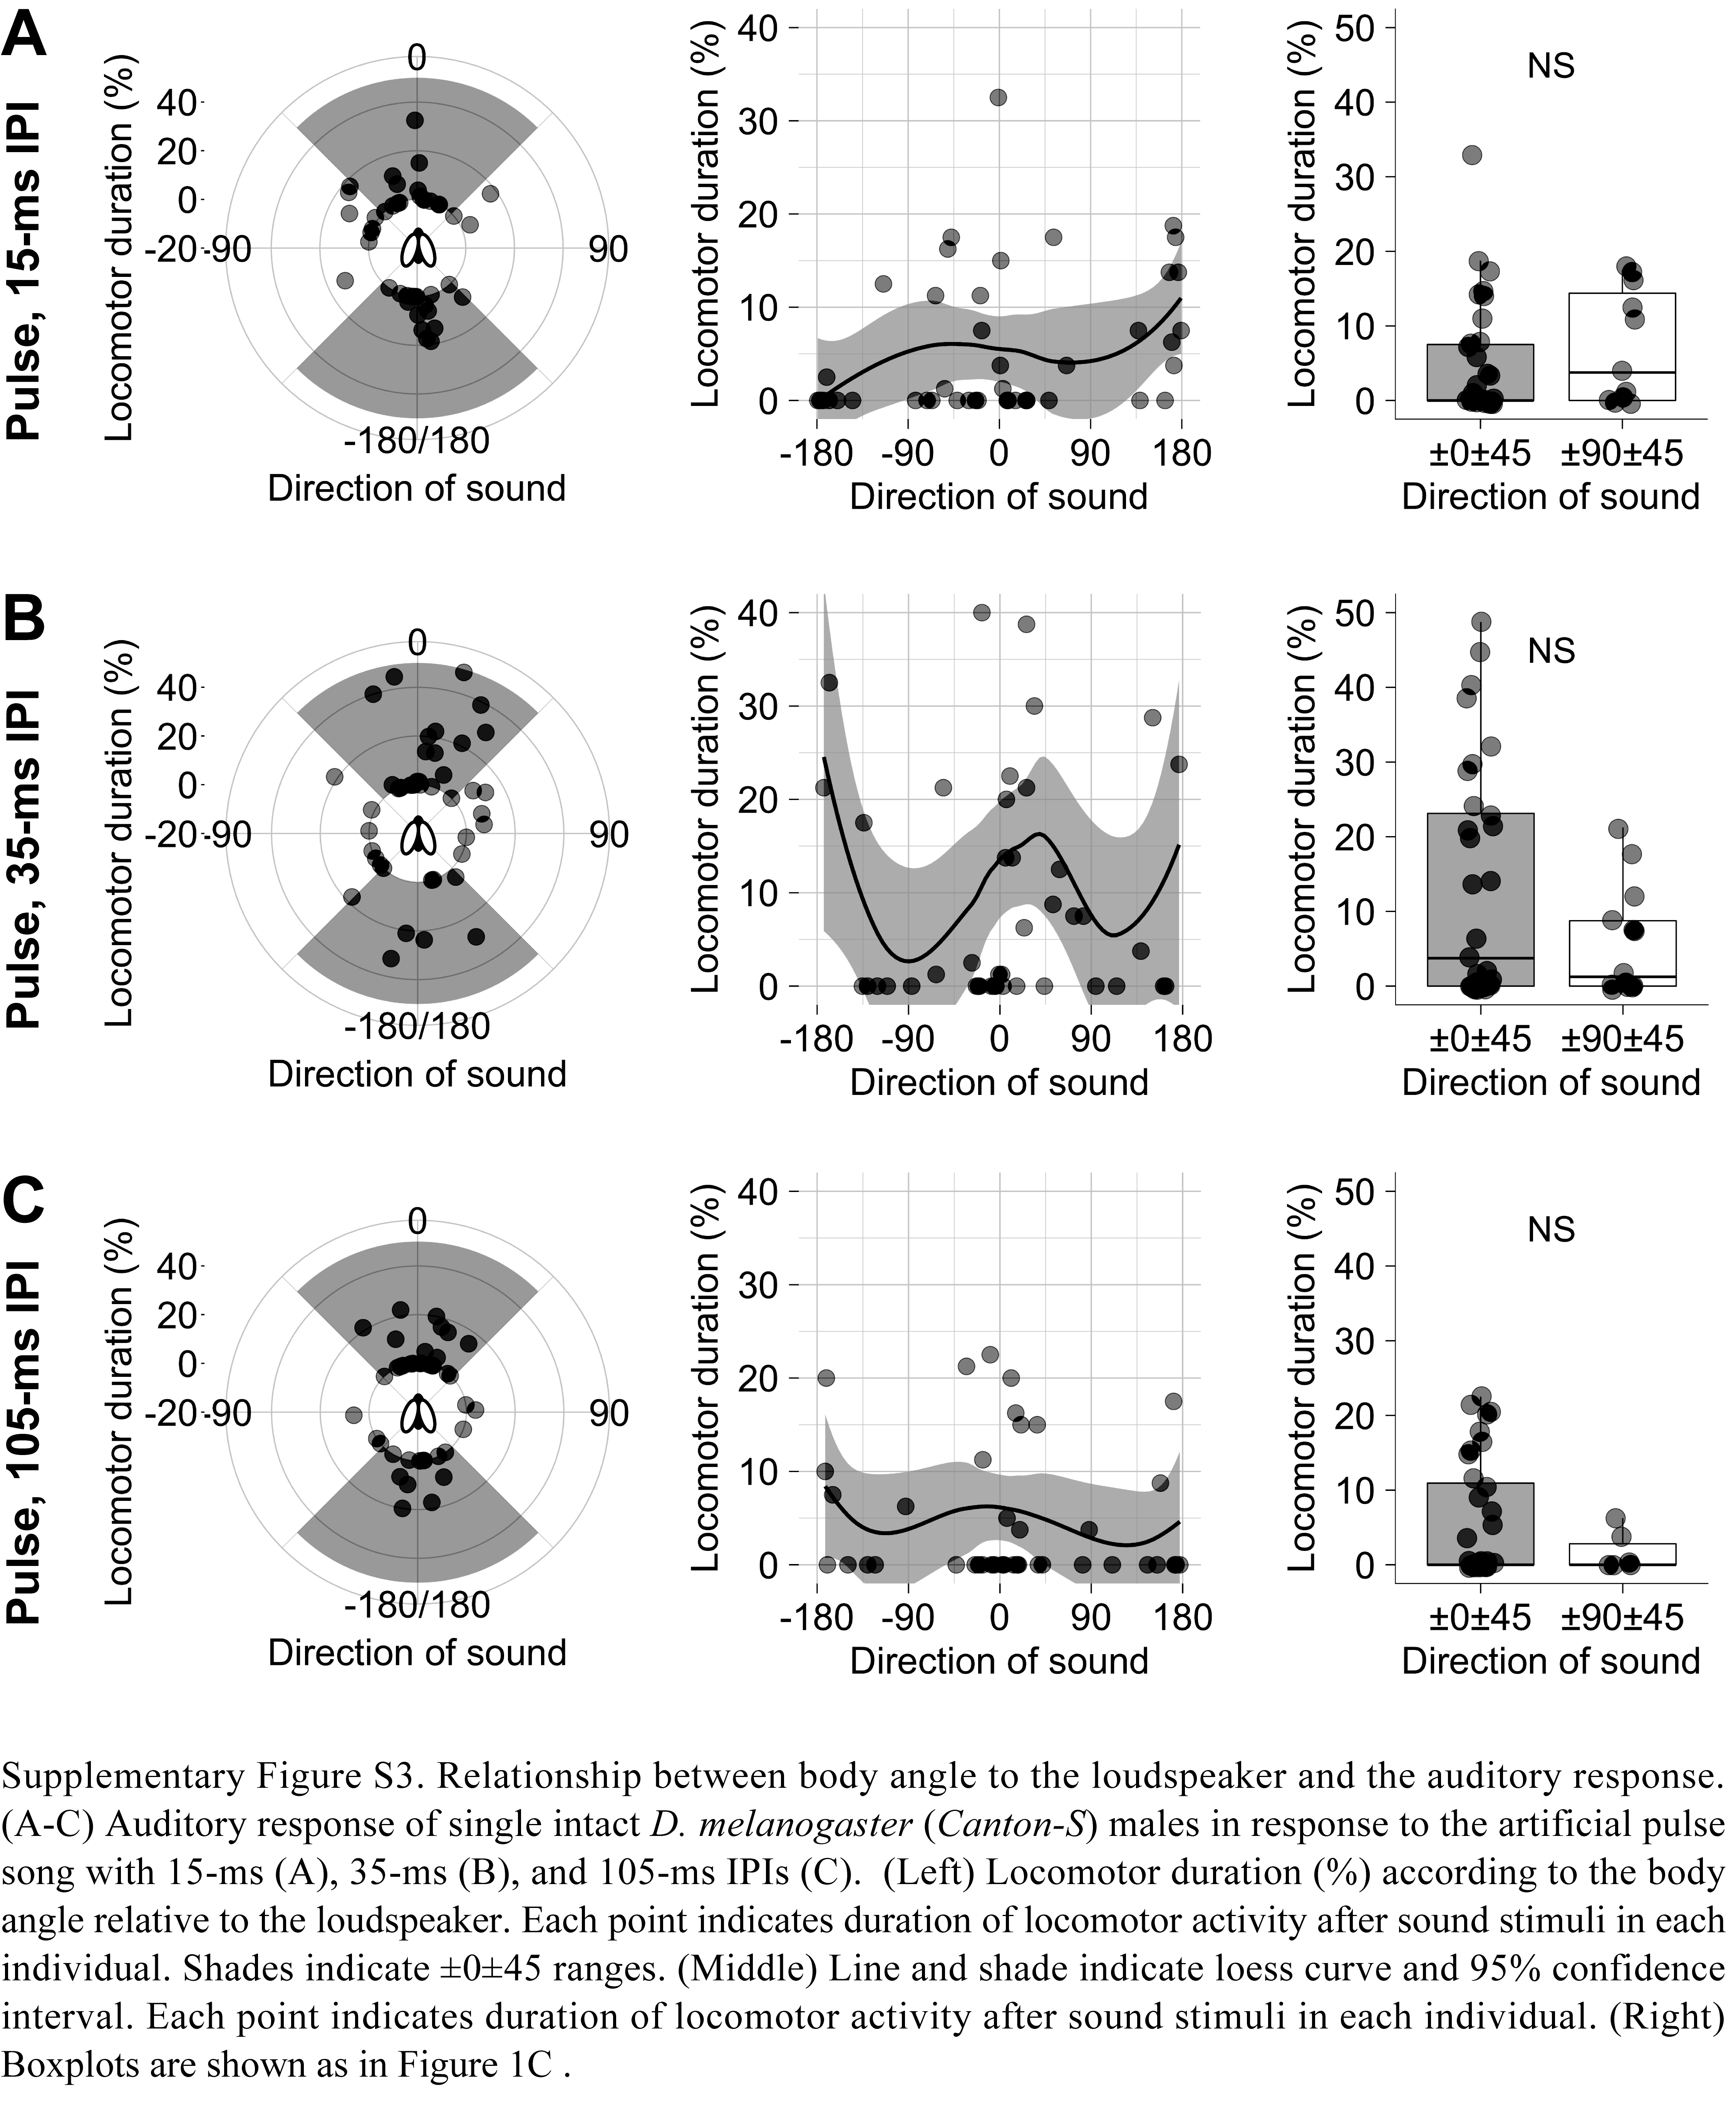

Supplement: Supplementary file 1 [file 1 › ineg_a_1611805_sm9096.tif]

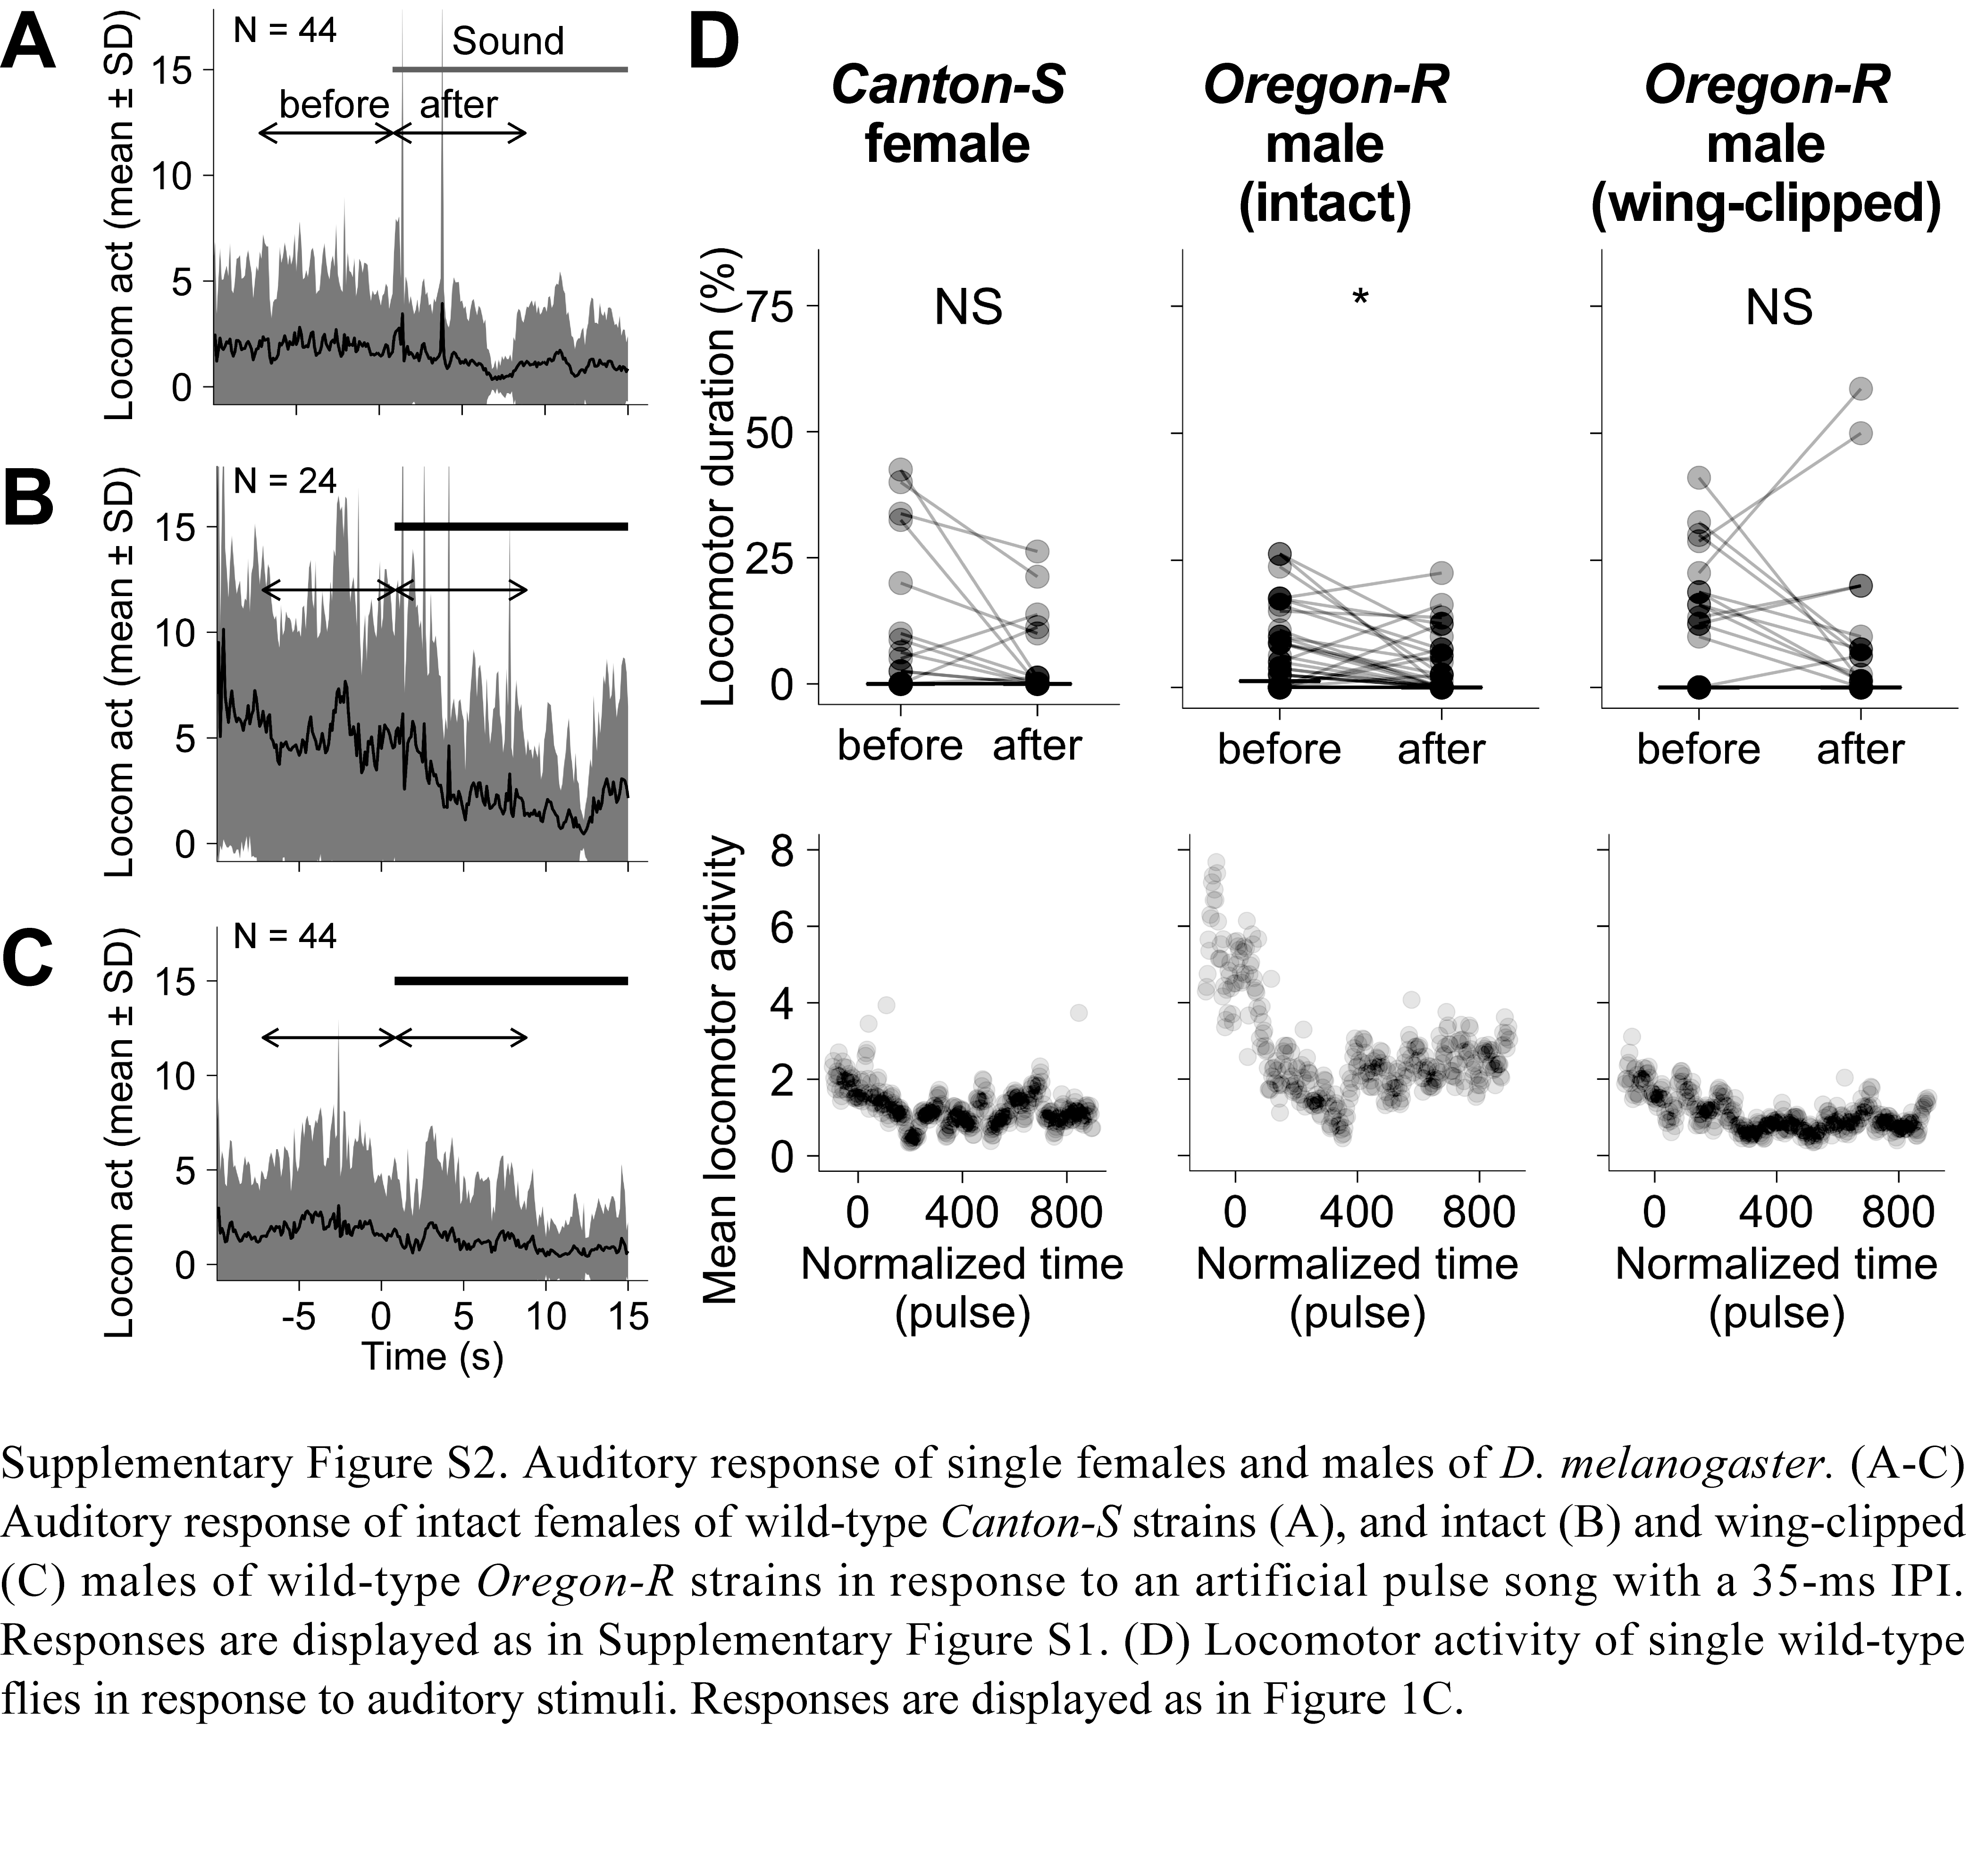

Supplement: Supplementary file 1 [file 1 › ineg_a_1611805_sm9095.tif]

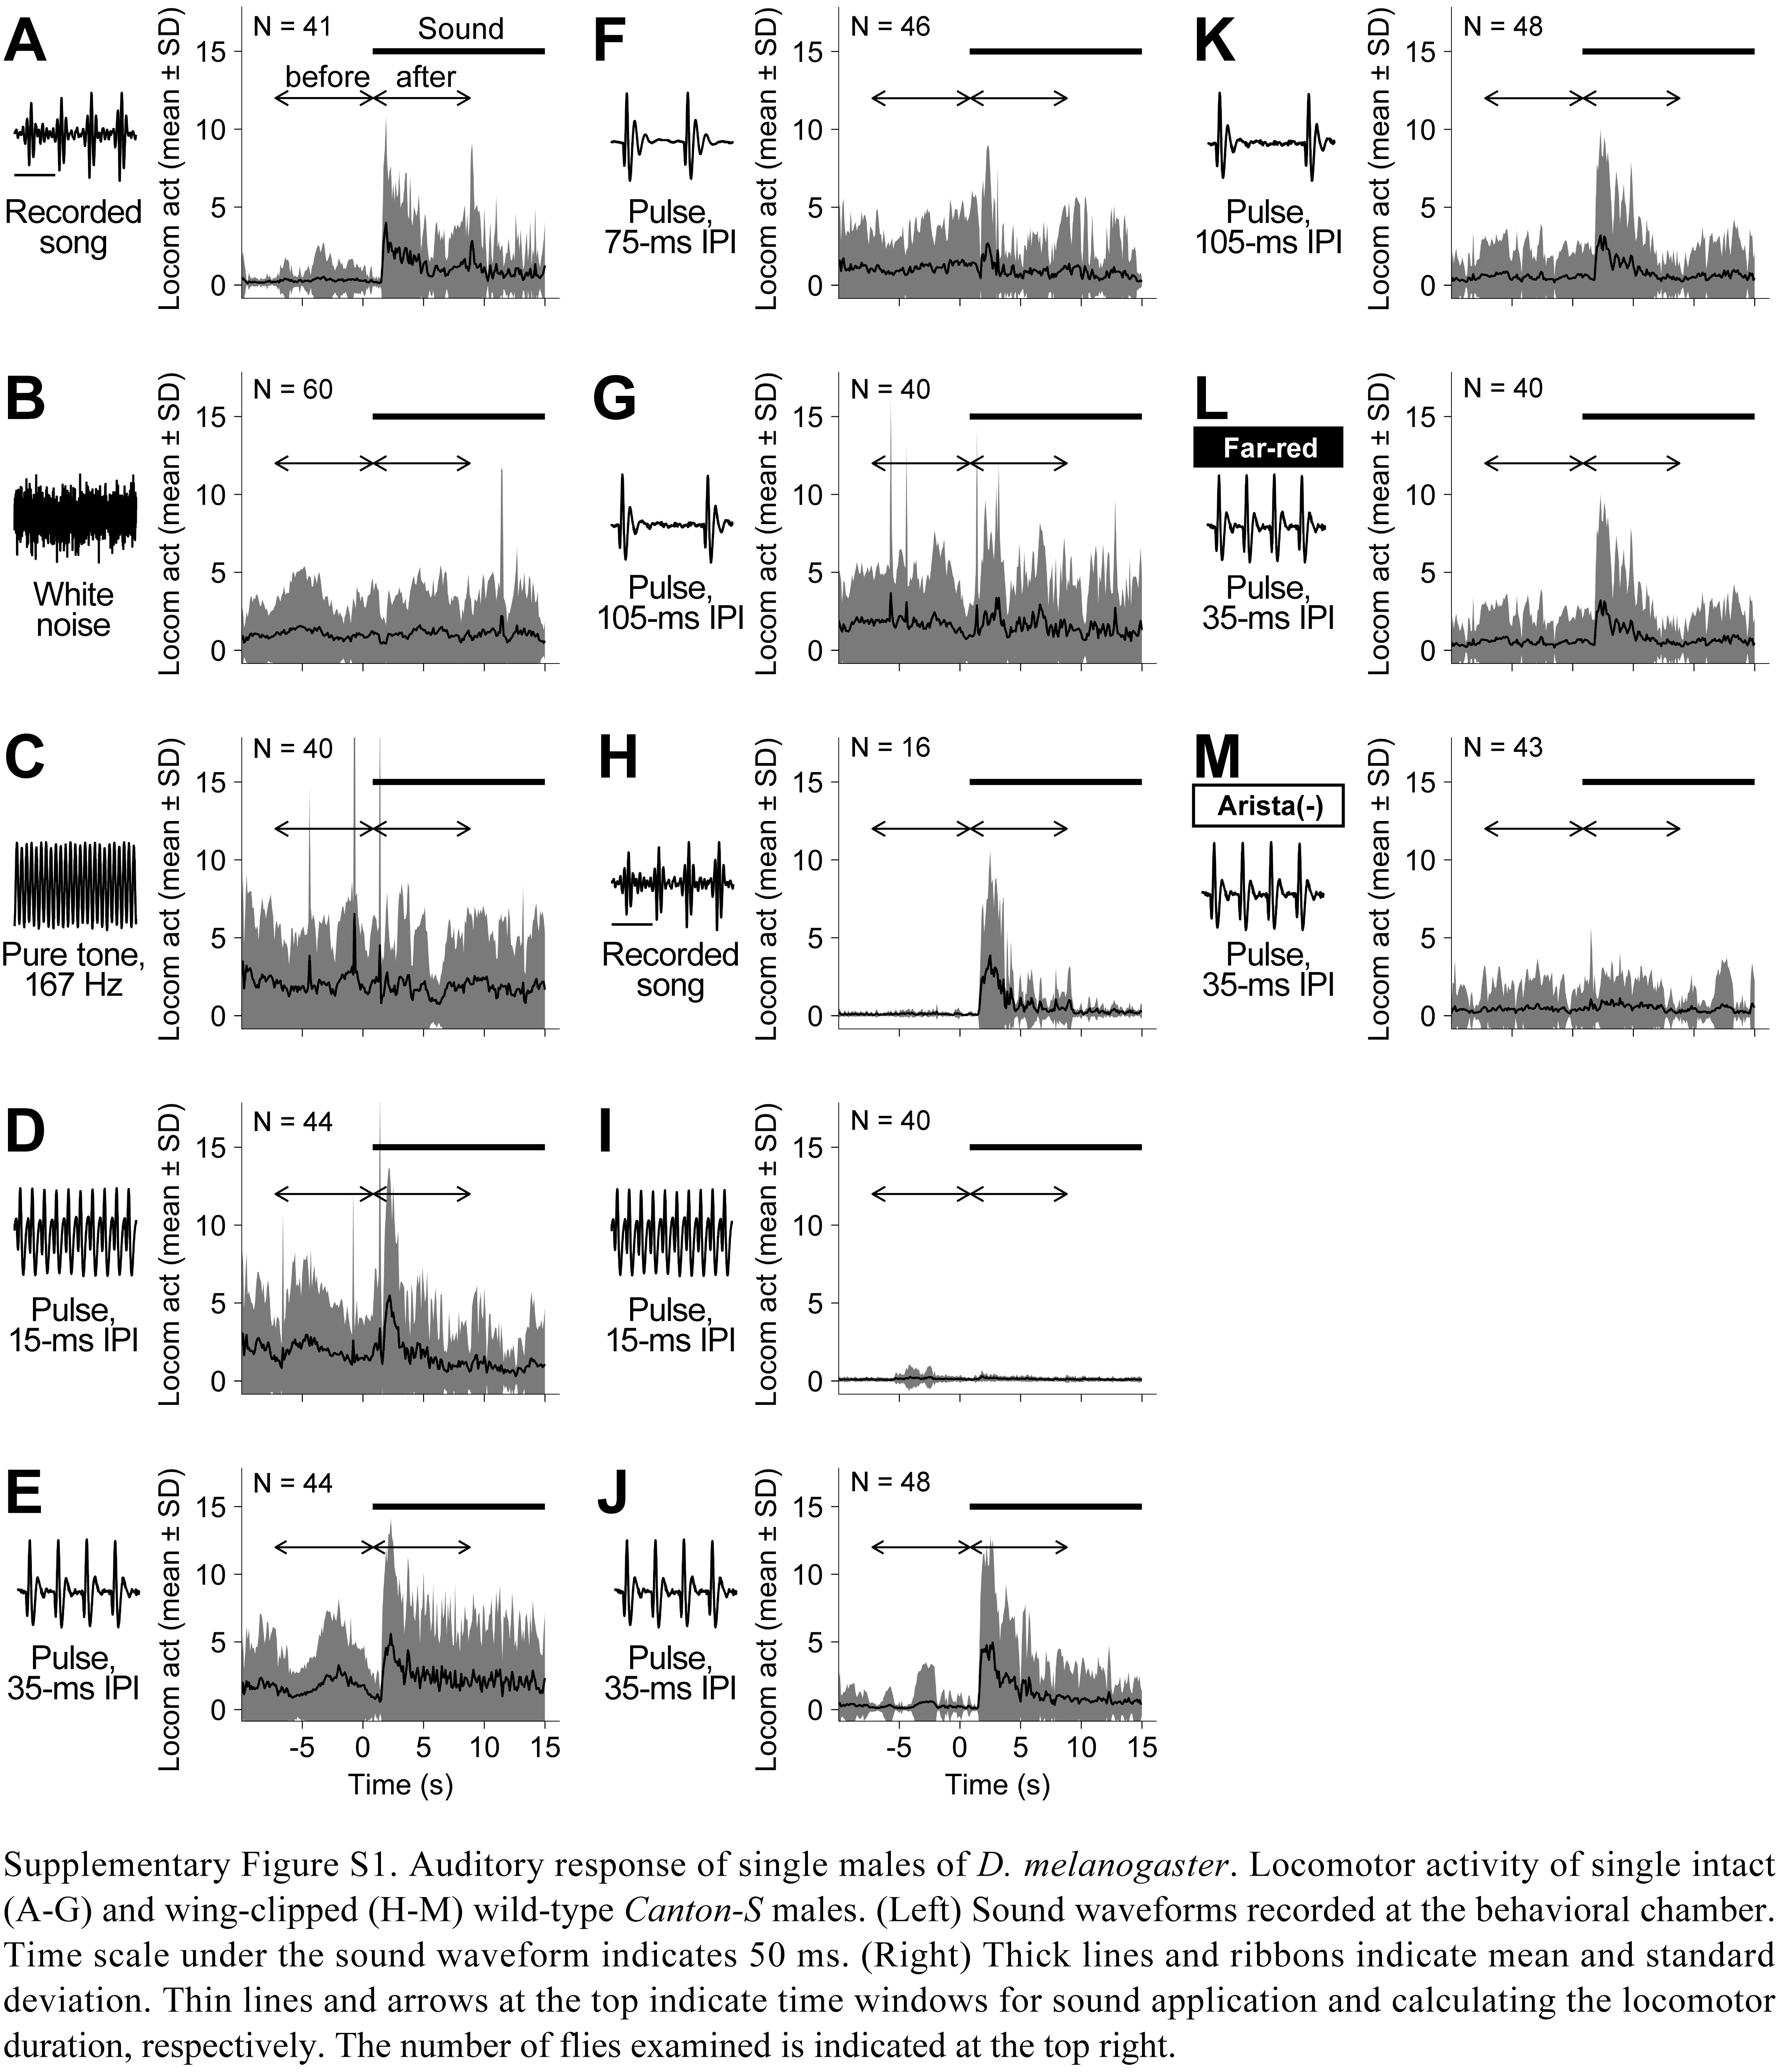

Supplement: Supplementary file 1 [file 1 › ineg_a_1611805_sm9094.tif]
